# Supplementary material for: A proximity-based programmable DNA nanoscale assembly line
Source: Springer Nature journal article supplement (doi:10.1038/nature09026), 2010-05-01
Supplement: 41586_2010_BFnature09026_MOESM300_ESM.pdf [file 41586_2010_BFnature09026_MOESM300_ESM.pdf]

The supplementary material contains the design of the origami (Figure S1), the sequences of the cassettes (Figures S2-S4), the design and sequences of the walker and the schematic drawings of the walking (Figure S5), non-denaturing gels of the cassettes and the walker (Figure S6), agarose gels of the Au-DNA conjugations (Figure S7), the movement of the walker on the origami (Figure S8), images of the dynamic switching for each cassette on the origami (Figure S9), zoomed TEM images for statistical analysis (S10-S11), distance distribution between 5 nm and 10 nm Au on the walker (S12) and the statistical analysis for different additions (Table S1).

### Sequences of Origami Helper Strands

Referring to Figure S1, there are totally 202 helper strands, labeled from 1 to 202. The color coding follows the conventions of Figure S1.

5'→3'

- 1: TGAAATTGTTATCCGCATAGCTGT
- 2: TTCCTGTGTTTTTCGGCCAGTGCCAAGCTCGACGTTG
- 3: TAAAACGATTTTCTTCGCTATTACGCCACGATCGGT
- 4: GCGGGCCTTTTTAGCTTTCCGGCACCGCAGATCGCA
- 5: CTCCAGCCTTTTAGGTTACGTTGGTGTATTGACCGT
- 6: AATGGGATTTTTCTTCCTGTAGCCAGCTATAATTTCG
- 7: CGTCTGGCTTTTAGCTGCTCATTTCAGTGCAAATCAACGTAACAA
- 8: GACAAGAACCGGATATTCATTACCAATAAGGC
- 9: TTGCCCTGAGGAACGCCATCAAAATTCATCAA
- 10: CATTAAATGGGAACAAACGGCGGAGATGGGCG
- 11: CATCGTAACGTATCGGCCTCAGGATTCTGGTG
- 12: CCGGAAACCAACTGTTGGGAAGGGGCTGGCGA
- 13: AAGGGGGAAGGGTTTTCCAGTCATGCATGCC
- 14: TGCAGGTCATTCGTAATCATGGTCTCACAATT

15: CCACACAACATACGAGCCGGAAGCATAAAGTG  
16: AGTTGATTTCTGGAAGTTTCATTCCGGGTACC  
17: GAGCTCGAGACTCTAGAGGATCCCCATGTAAC  
18: TACAGGCAGTAGCATTAAACATCCATAAGTTGG  
19: GTAACGCCTGTGCTGCAAGGCGATATAAATCA  
20: ATGCAATGTTTTAGAACCCCTCATACGCCATTC  
21: AGGCTGCGCAGGCAAAGCGCCATTTATTTTAA  
22: GCCTGAGAATCTACAAAGGCTATCTTGAGGGG  
23: ACGACGACCCGTGCATCTGCCAGTAGGTCATT  
24: CGATGCACCCGTGCGATTCTCCGTGTGAGCGAGTAACAACAGTCGCTT  
25: AATTGGGCTTTTTGTTAAATCAGCTCATTTTT  
26: TAACCAATACGAGAACACCAGAACGAGTAGTA  
27: AGGCTGGCTGACCTTCATCAAGAGTAATCTTC  
28: GGACAGATGAACGGTGTACAGACCTCAACTTT  
29: GCGTTAAATTGAGATGGTTTAATTAGGCGCAT  
30: AATCATTGAACGTTAATATTTTGTTAAAATTC  
31: TTTGAGAGGTCTGGAGCAAACAAGAGAATCGA  
32: TGAACGGTTTAATGCCGGAGAGGGGTAAAGAT  
33: ATAAAAATCCTGAGTAATGTGTAGTAGCTATT  
34: TCAAAAGGAGAAGCCTTTATTTCAAATAAG  
35: TAATAGTAAGGCAAAGAATTAGCAACGCAAGG  
36: CAATAAAGCTGAAAAGGTGGCATCAGTAGATT  
37: GCTGTA CTTTGGTTACTCGTACAACGTACGGTGCCCAATTCTGCGAACGAATTCTAC  
38: TAGTTTGAACATGTTTTAAATATGGAGCTAAC  
39: TAAAGCCTGGGGTGCCTAATGAGTCAACTAAA GTTGTACG  
40: TCACATTAATTGCGTTGCGCTCACCTGGTGCT  
41: GTAGCTCACCATTAGATACATTTCTCATTTGGGCTACGTC

42: ACTTGTATGGGACGTAGCGGCGCGAGCCTCAGAGCATAAAGCGTAATACT  
43: TTTGCGGGGTGAGAAAGGCCGGAGCGTTCTAG  
44: CTGATAAAAATCGTAAAACCTAGCATGTCAATC  
45: AAATTGTATGAATTACCTTATGCGTTGAAAGA  
46: ATAAGGGAACCGAACTGACCAACTATTTAAG  
47: AACTGGCTCATTATACCAGTCAGGGGTCAATC  
48: CAGTTGAGGGAAGATTGTATAAGCAAATATTT  
49: CGTGCCTA AAAAGCCCCAAAACAATTTAGGAATACCACAAGATTCAT  
50: GTTTACCACCCGGTTGATAATCAGGGTGGCTA  
51: ATATGTACGACGACGATAAAAACCTAACCCTC  
52: GTCCAATACAATATGATATTCAACACAGTCAA  
53: ATCACCATCTGCGGAATCGTCATATGGATAGC  
54: GTCTTTACAAAACATTATGACCCTTAAATCGG  
55: TTGTACCACCTGACTATTATAGTCAAATCAG  
56: AGCTTCAACTGTTTAGCTATATTTGCAAATGG  
57: TCAATAACAGCGAACCAGACCGGATTAATTCG  
58: TCCACATCGGACTCTGTGCTAGCATTGGCTTAGAGCTTAATTGCTGAATTGCCCGCT  
59: TTCCAGTCGGGAAACCTGTCGTGCTTTGCGGAATGCTAGC  
60: CCAACAGGTTGATAAGAGGTCATTCAGCTGCA  
61: AGCGGATTCTTCAAATATCGCGTTAGCAAACCT  
62: TTGAATCCGAATGACCATAAATCAAGAAGCAA  
63: GAGAGGCTAGTAAAATGTTTAGACAATATTCA  
64: ATGCAGATAAGAGCAACACTATCAAAAATAGC  
65: AAGAAAAAATTATTACAGGTAGAATTCAACTA  
66: ACTTAGCCGGAACGAGGCGCAGACACGTTGGG  
67: ATTGTGTCGAAATCCGCGACCTGCTCCATGTT  
68: GGAACAACCTCTACGTTAATAAAAACCTAATAATT

69: TTTTCACGCTAAAGGAATTGCGAAGAATAAC  
70: GCTAACTGAATTACGAGGCATAGTACATAACGCCAAAAGGGGTATGCG  
71: GGGGTAATTTTGCAAAGAAGTTTAGTTTCGT  
72: CACCAGTAATGTACCGTAACACTGTGCCAGAG  
73: GAAAACGACCCTCAAATGCTTTAAGGTTGATA  
74: TAAGTATATAAGTGCCGTCGAGAGACAGTTCA  
75: CCGAAAGAGCATCAAAAAGATTAACCTTGAGT  
76: AACAGTGCTTTAACGGGGTCAGTGGAGGAAGC  
77: TGCTCCTTTCAGGATTAGAGAGTAAGGCAGGT  
78: CAGACGATCATTGACAGGAGGTTGCCTTTAAT  
79: TTAATGAATCGGCCAACGCGCGGGGAGAGGCG  
80: GTTTGCGTATTGGGCGCCAGGGTGCCAGAGCCAGCGTAAG  
81: CTACACGTACCGACATCCTTACGCTGCCGCCAGTGGCCTTGATATTCAGTACTGG  
82: TAATAAGTCCGTATAAACAGTTAACTCAGTAC  
83: CAGGCGGAGCCCGGAATAGGTGTAAGCCCAAT  
84: AGGAACCCCAAACACTACAACGCCTGTAGCATT  
85: AGGAACAATTGAAAATCTCCAAAACCTGATAA  
86: GTACAACGGAGATTTGTATCATCGAAAAGGCT  
87: CAAAAGGAGTTTCAGCGGAGTGAGAATAGAA  
88: CACAGACAATTTTCAGGGATAGCATCACCGTA  
89: CTCAGGAGGATTAGCGGGGTTTTGTGCCCCCT  
90: GCCTATTTTTTTGATGATACAGGAGAAACGAAT  
91: GGATCTTCGCCACCAGAACCACAGTTTTTCT  
92: TTTCACCAGTGAGACGGGCAACAGCACCAACC  
93: TCAGAGCCATTAAAGCCAGAATGGAGCGTCAT  
94: TCATGGCTCGGAACCTATTATTCTTCAAGAGA  
95: AGGATTAGGTTTAGTACCGCCACCCAGAGCCA

96: CCACCCTCGCCCTCATAGTTAGCGTAACGATC  
97: CTTTCAACAGCCTTTAATTGTATCGAAACAAA  
98: ACCCCCAGCGATTATACCAAGCGCGGTTTATC  
99: AGCTTGCTTTCGAGGTGAATTTCTCATCTTTG  
100: GTATGTTATCTGTATGGGATTTTGCTAAACAA  
101: **CCAGACGG**GTTAGTAAATGAATTTGCAAACGTAGAAAATAATTACGCA  
102: TAGAAAATTGTCGTCTTTCCAGAC**CACTAGTG**  
103: TAAAGTTTTCATATGGTTTACCAGACAATCAA  
104: AAGGTGAATCAGAACCGCCACCCTCTCAGAAC  
105: CGCCACCCTTATCACCGTCACCGAATTCATTA  
106: CACCAATGAAGAGGCTGAGACTCCGAAACATG**GTGACGAA**  
107: **CTTCATGGCATTTCGTAC**AAAGTATTA AACCATCGATAGCAGGGAAACGT  
108: CGGTCATAATTTACCGTTCAGTAAAAGCGCA  
109: GTCTCTGAGCCCCCTTATTAGCGTGGCATT  
110: **CCGCTATGCACTCGATGCCAGTGAT**CCTCAGAACCGCCACCCTCAGAGCCTGATTGC  
111: CCTTCACCGCCTGGCCCTGAGAGAGCCGCCAC**ATCACTGG**  
112: TTTTCATAAACCGCCTCCCTCAGAGTTGCAGC  
113: TCAGTAGCGTAGCGGTTTTTCATCTTGCCATC  
114: ATTTGGGATACCATTAGCAAGGCCACCGTAA  
115: ACAAAGGAATATTGACGGAAATTCTTGAGCC  
116: AAGGTGGCATAAGTTTATTTTGTCCGCAAAG  
117: TTGATACCATGATTAAGACTCCTTCATACATA  
118: GGCGAAAGAATACTAAAACACTTAAACAGC  
119: CCACTACGAAGGCACCAACCTAAAACGAAAGA  
120: GAACTGGCGATAGTTGCGCCGACAATGACAAC  
121: AACCATCGGCAATAATAACGGAATACCCAAAA  
122: **TCAACGTC**GCAAAGACACCACGGAAACATATAAAAGAAAC**CCACCGAT**

123: GGAAGGTAGCGACATTCAACCGATTATTTATC  
124: CCAATCCAAAATAAACAGCCATATTGAGGGAG  
125: AGCACCATATTAGAGCCAGCAAAAAAGTACCG  
126: ACAAAGGGTAATAAGAGAATATATCACCAGT  
127: GTCAGACTGACAGAATCAAGTTTGGTAAATCG  
128: TCGCTATTGAATAACCTTGCTTCTCCTTTAGC  
129: ACCACCGGATCAAATCACCGGAAATTAATTT  
130: TAAAAGTTCCTTTGCCCGAACGTTCCAGAGCC  
131: AAGCGGTCCACGCTGGTTTGCCCCAGCAGGCG  
132: AAAATCCTGTTTGATGGTGGTTCCACAACCTCGAGTCACAC  
133: AACCGTGTCTACGCATCGTGTGACTTATTAATTGAGTAACATTATCATATCAATAT  
134: ATGTGAGTAATTAATTTTCCCTTAAGGCATTT  
135: TCGAGCCATAAAGTAATTCTGTCCTAATTTGC  
136: CAGTTACAAATAAGAAACGATTTTTTGTTTAA  
137: GAGGAAACCCACGCATAACCGATACGTAATG  
138: AAGTTTCCATTAAACGGGTAAAATATATTCGG  
139: TCGCTGAGGAACAAAGTTACCAGAAGGAAACC  
140: CGTCAAAGCGTCTTTCCAGAGCCAGACGACG  
141: ACAATAAACATGTAATTTAGGCAGGAATCCTT  
142: GAAAACATTGGAAACAGTACATAATTTGCGGA  
143: ACAAAGAACTTTACAAACAATTCGGAAATCGG  
144: CAAAATCCCTTATAAATCAAAGAATTTAGAA  
145: GTATTAGAACCACCAGAAGGAGCGGAATTACC  
146: TTTTTTAAAGCGATAGCTTAGATTTATTTAACTGTCATAG  
147: GGAGTCGGCACTATGACAACGCCAACAACATGTTTCAGCTAATTACCAAC  
148: GCTAACGAATGAAAATAGCAGCCTTTACAGAG  
149: AGATAGCCGCTTGCAGGGAGTTAATCATGAGG

150: AGGCTTTGAGGACTAAAGACTTTTAGGCCGCT  
151: TTTGCGGGATCGTCACCCTCAGCAGGCTACAG  
152: TCTTACCGAAGCCCTTTTAAAGAAAAGTAAGC  
153: GCAGTTGCCAGAGAGATAACCCACAAGAATTGAGTTAAGCAATAGCTA  
154: CAGAGGGTAATTGAGCGCTAATATGCTACGAT  
155: AGAATAACATAAAAAACAGGGAAGCAACAAAGT  
156: CCAGCTACAATTTTATCCTGAATCTGCAGAAC  
157: GCGCCTGTTTATCAACAATAGATATTTTGCAC  
158: GTAGGGCTTAATTGAGAATCGCCAAAGACGCT  
159: GAGAAGAGTCAATAGTGAATTTATGCTCAACA  
160: TAATTACATTTAACAATTTCAATTTGAATTATC  
161: ATCATATTCCTGATTATCAGATGAAACAAAAT  
162: TAACGACACTTGCATCAGCTATTGACGTCAATAGATAATACATTTGAGGATAGCCCG  
163: AGATAGGGTTGAGTGTTGTTCCAGATTAGAGCTCAATAGC  
164: CATCAATACACTAACAATAATAGTTTGGAAC  
165: TAGGTCTGAAACAAACATCAAGAATGGCAATT  
166: ACAAGAAACCAGTATAAAGCCAACCAAAATCA  
167: CGGGAGAATCAAGATTAGTTGCTAAGTCCTGA  
168: AAGAGCAATTTTTTAACTGAACACCCTGGCATTAGA  
169: CAGCATCGTTTTGAAACAATGAAATAGCCCAATAAT  
170: GAACGAGGGTAGCAACGCGAAAGA  
171: AATTCTTAAATAATATCCCATCCTGTTTTGAAGCCTTAAA  
172: AGATGATGAGAGACTACCTTTTTAGTTATACA  
173: TTTAGGTGTAATCCTGATTGTTTGGCAAAAGA  
174: AAGAGTCCACTATTAAAGAACGTGAAAATATC  
175: TTCTGAATTTGAGGAAGGTTATCTGACTCCAA  
176: CTTAGGTTCAATTTCAATTACCTGAGATTATAC

177: AGCATGTAGTTTAGTATCATATGCACCTCCGG  
178: AGCGAACCTCCCGACTTGCGGGAGAATTTACG  
179: TTATCCGGTATTCTAAGAACGCGAGGCGTTTT  
180: AAAAGCCTGAAACCAATCAATAATCGGCTGTC  
181: TTTCTTAAACACCGGAATCATAATTACTAGA  
182: GAATTATTGGGTTATATAACTATATGTAAATG  
183: CTGATGCACAAGTTACAAAATCGCGCAGAGGC  
184: GAAAGGAATATGGAAGGAATTGAACCAACCAT  
185: ATCAAAATTGGTCAGTTGGCAAATCAACAGTA  
186: CGTCAAAGGGCGAAAAACCGTCTATCAGGGCG  
187: ATGGCCCACTACGTGAACCATCACACCCTCAA  
188: TCAATATCTATTAGCACGTAAAACCTGATTGCT  
189: TTGAATACAATCCAATCGCAAGACGCGTTAAA  
190: TAAGAATATCATTCCAAGAACGGGTAGAAGGC  
191: GCCCAATAGCAAGCAAATCAGATATATTAAC  
192: CAAGTACCCCGTGTGATAAATAAGAAAGAACG  
193: CGAGAAAACAATAACGGATTCGCCAGAAATAA  
194: AGAAATTGGAACCTCAAATATCAACCAAATCA  
195: AGTTTTTTGGGGTCGAGGTGCCGTAAAGCATC  
196: ACCTTGCTCGTAGATTTTCAGGTTTTTACATC  
197: GGGAGAACTTTTTCAAATATATTTGGTTTGA  
198: AATACCGAGCACTCATCGAGAACAATTACCGC  
199: TTTTCATCGTAGGAATCAGCAAGCC  
200: GTTTTTATTTTTCTGACCTAAATTTAATTAGTTAA  
201: TTTTCATCTTTTTTACAGTAACAGTACCTTAACGTCA  
202: GATGAATATTTTAGCAAATGAAAAATCTAAAGCACTAAATCGGA



**Figures S1-S5.** Molecular Details of the Molecules used in this Work.

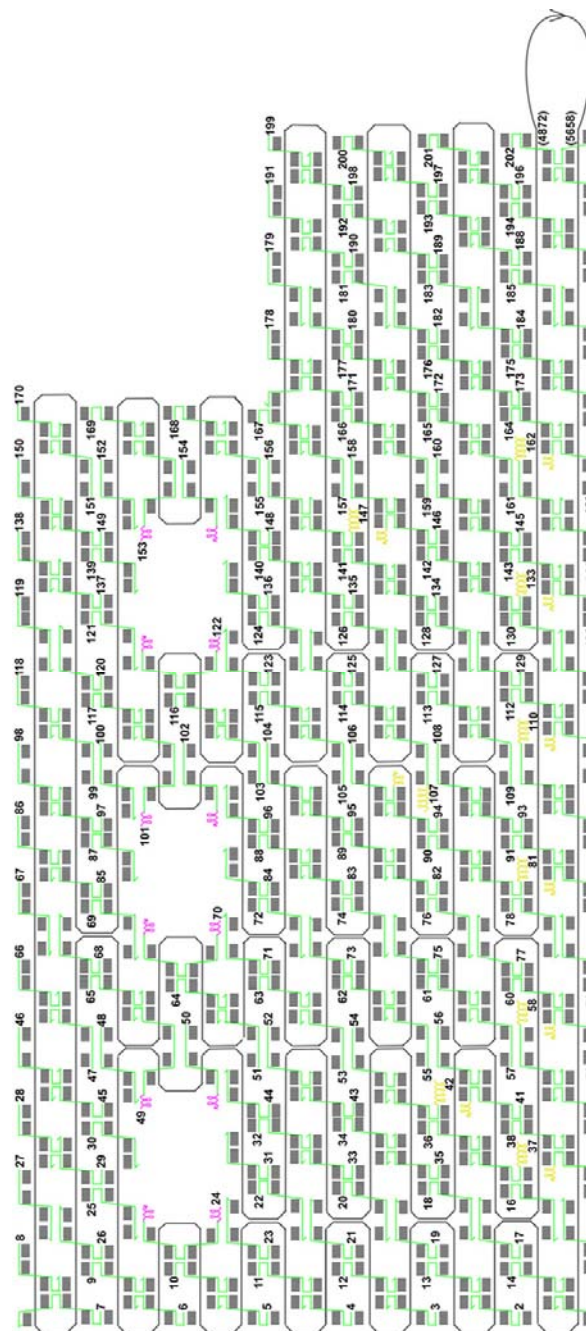

**Figure S1. The Strand Structure of the M13 Origami Used in This Work.**

202 helper strands were used to form the origami with 3 slots. 9 Single strand extensions are labeled purple around the slots. They were designed to bind with cassettes and position them on the slots. Another 18 single strand extensions are labeled tan for the walker binding. The sequence used for the circular M13 plasmid in this work starts from 5658 and ends at 4872. The colored strands were purified individually by denaturing PAGE.

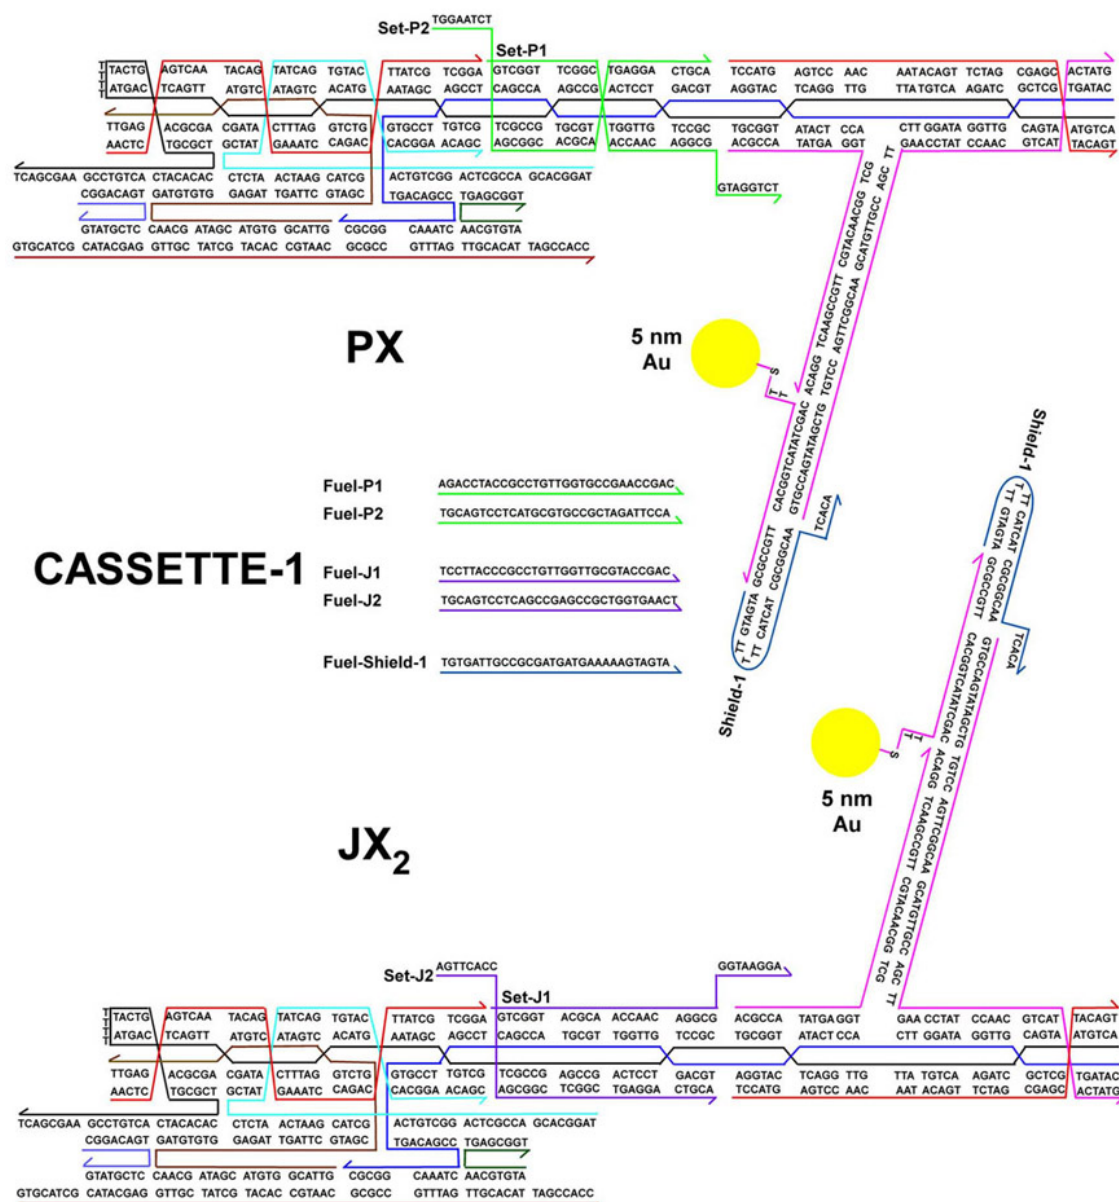

**Figure S2. The Sequence of Cassette 1 in the PX and JX<sub>2</sub> States.**

The PX state is shown on the top and the JX<sub>2</sub> state is on the bottom. The cassette consists of four DNA duplex domains. The bottom two duplexes form the DX motif, which can be inserted into the left slot of the origami by double cohesion. The top two duplex domains form the PX/JX<sub>2</sub> device motif. The strands which set the cassette to the PX or JX<sub>2</sub> state were labeled as Set-P1/2 or Set-J1/2, respectively. The strands that are completely complementary to the set strands were labeled as Fuel-P1/2 or Fuel-J1/2, respectively. The same convention applies for Figure S3 and S4. The cargo strand for carrying a 5 nm Au nano-particle on the duplex arm was modified with a -SH group. The overhang part of the cargo strand was protected by the Shield-1 strand, which could be removed by its completely complementary strand Fuel-Shield-1.

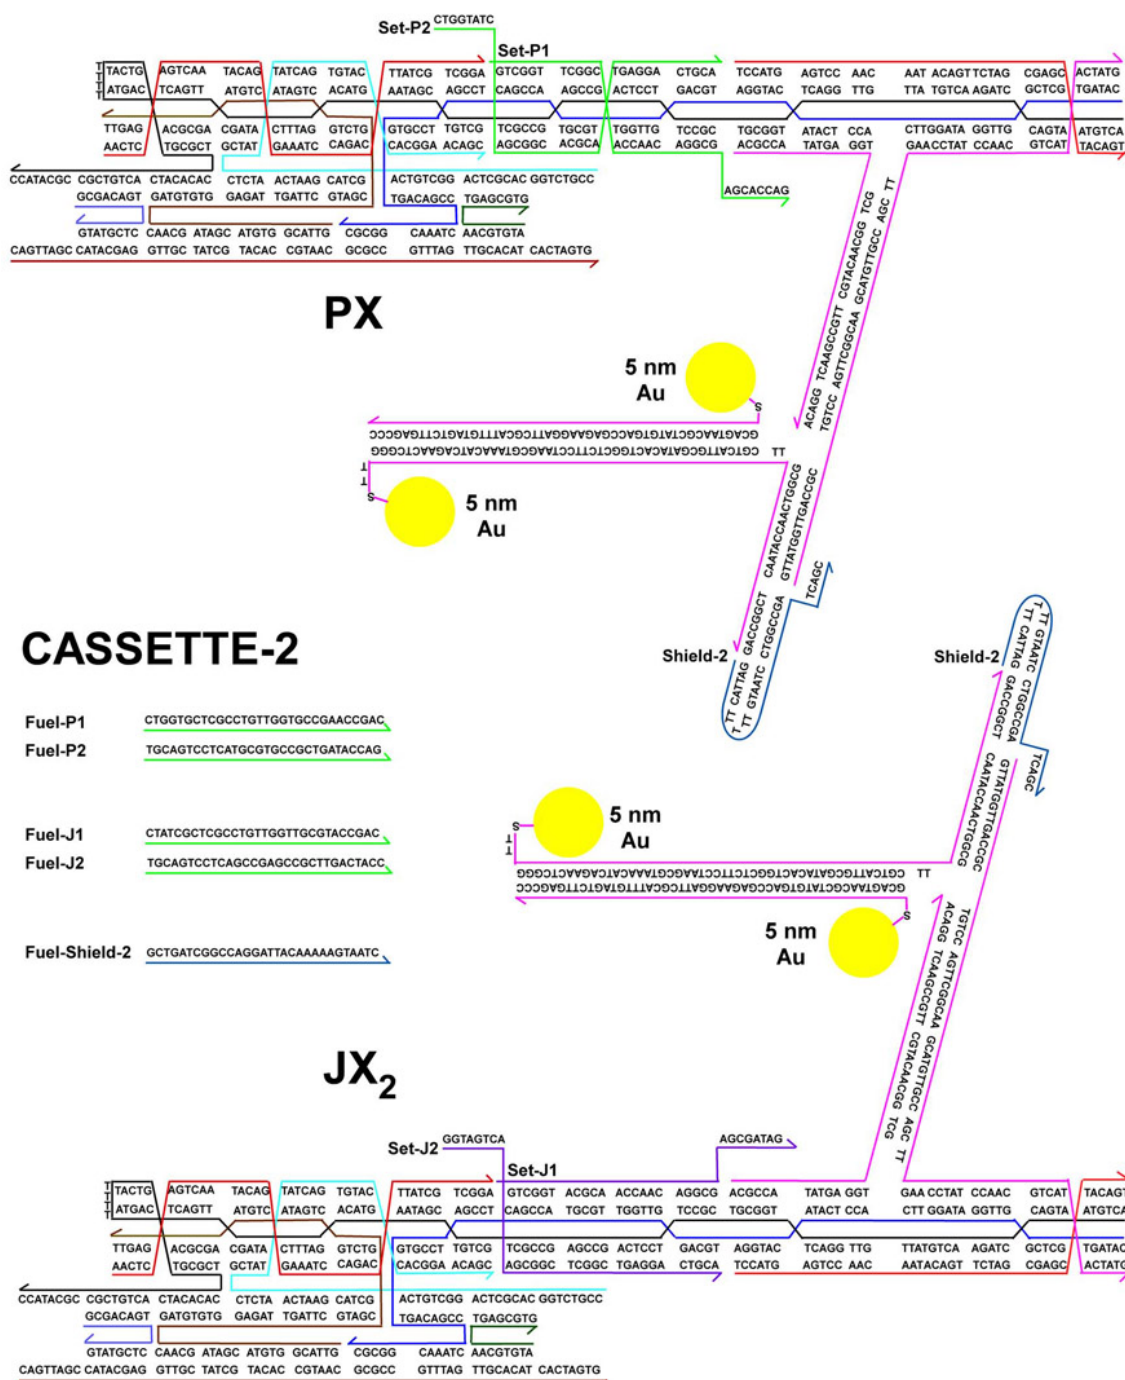

**Figure S3. The Sequence of Cassette 2 in the PX and JX<sub>2</sub> States.**

The same conventions apply as in Figure S2. The cargo strands for carrying double 5 nm Au nanoparticles on the duplex arm were modified with a -SH group. The overhang part of the longer cargo strand was protected by the Shield-2 strand, which could be removed by its completely complementary strand Fuel-Shield-2.

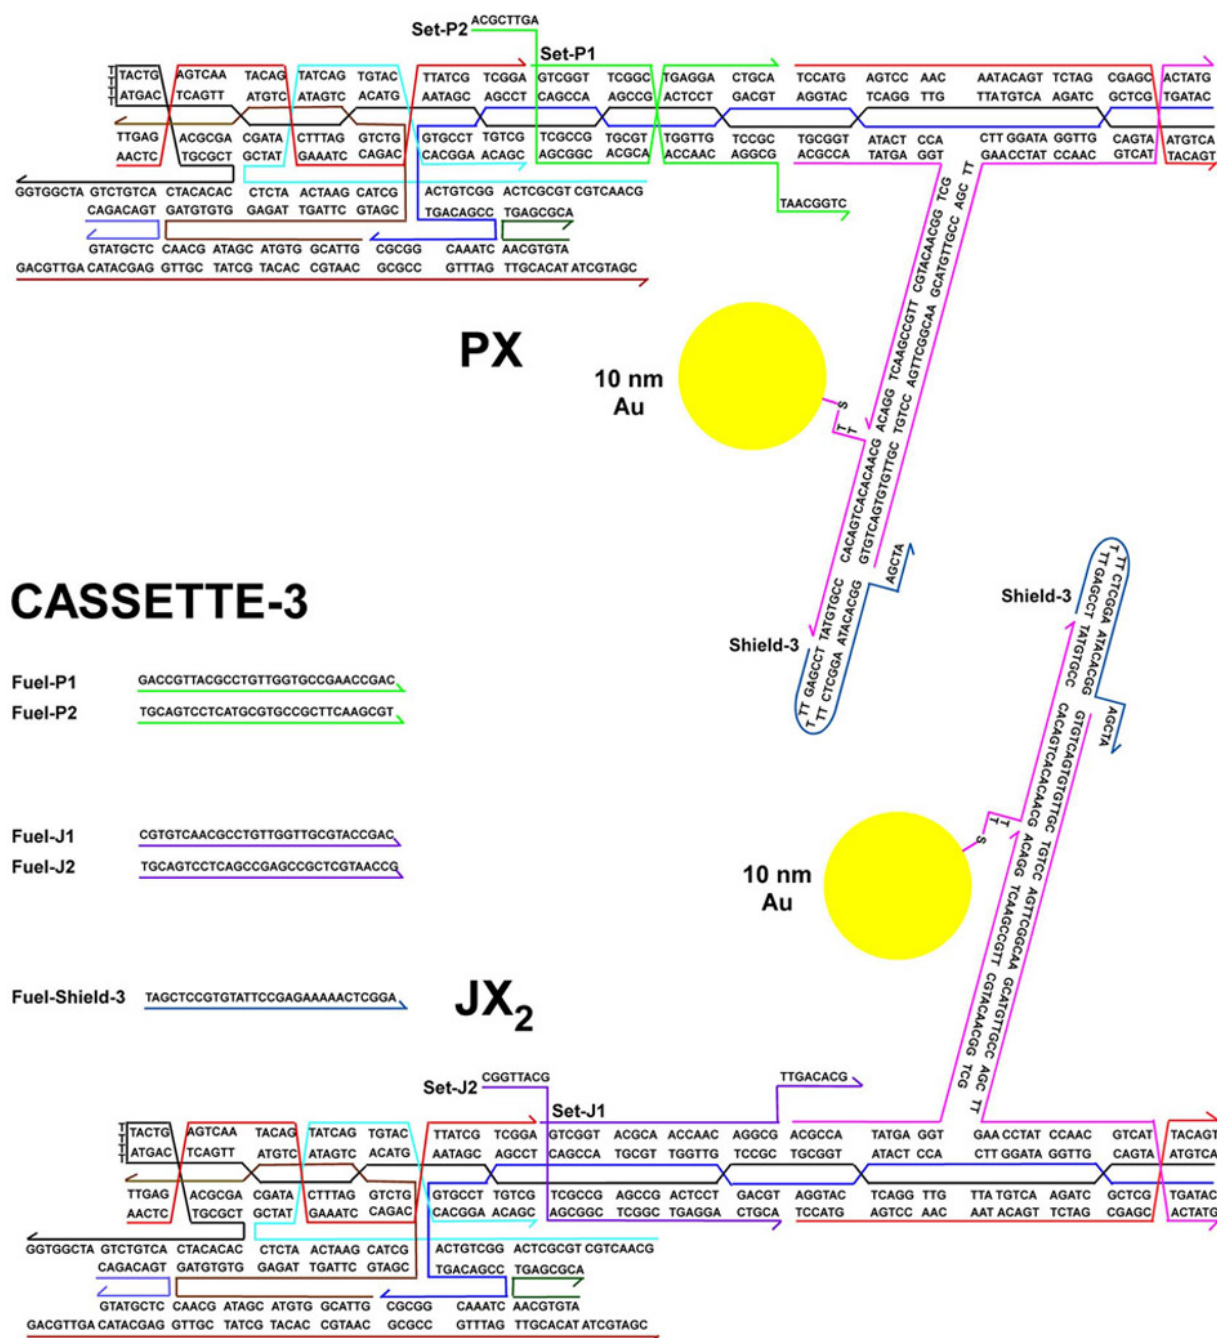

**Figure S4. The Sequence of Cassette 3 in the PX and JX<sub>2</sub> States.**

The same conventions apply as in Figure S2. The cargo strand for carrying a 10 nm Au nano-particle on the duplex arm was modified with a -SH group. The overhang part of the cargo strand was protected by the Shield-3 strand, which could be removed by its completely complementary strand Fuel-Shield-3.



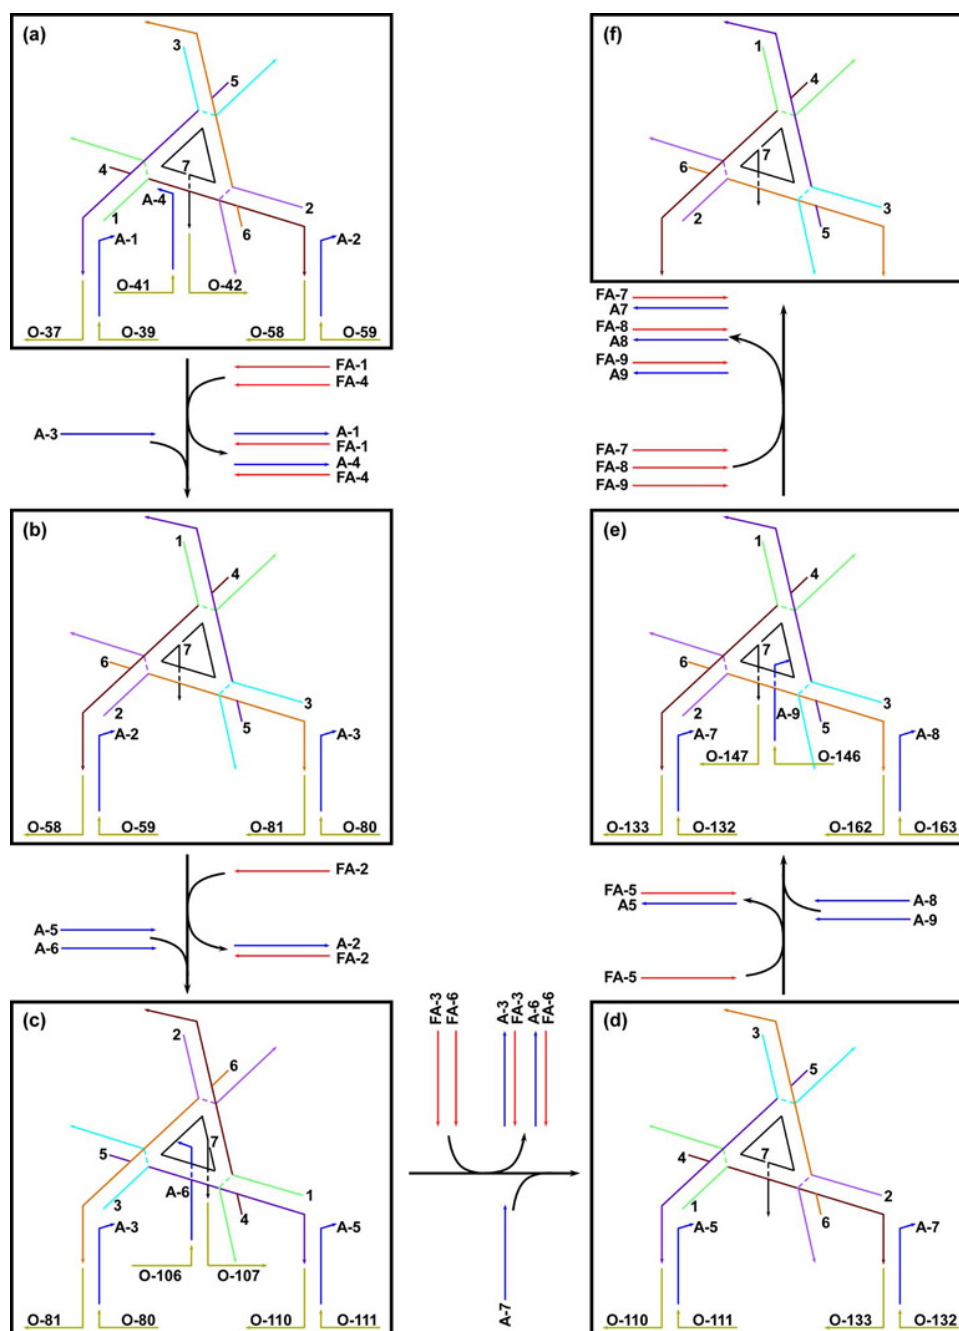

**Figure S5. Schematic Drawings of the Whole Walking Process and the Sequence of the Walker.**

The walker consists of 7 strands, which were labeled as 1 to 7. Single strand extensions from strand 4, 5, 6 and 7 act as feet of the walker. The feet could bind with the origami helper strands (labeled as O-\*) by anchor strands (labeled as A-\*). The anchor strands could be removed by the completely complementary fuel strands (labeled as FA-). Totally there are 9 anchor strands and 9 fuel strands.

\* Some labels refer to origami strands in Figure S1, different from those in the main text. To clarify, the correspondence between the notation in Figure S5 and in Figure 2 is shown in the table below.

|           |                                     |
|-----------|-------------------------------------|
| O37 ↔ 1a  | A1 (in part) ↔ the complement to 1a |
| O42 ↔ 4a  | A2 (in part) ↔ the complement to 2a |
| O58 ↔ 2a  | A3 (in part) ↔ the complement to 3a |
| O81 ↔ 3a  | A4 (in part) ↔ the complement to 4a |
| O107 ↔ 4b | A5 (in part) ↔ the complement to 1b |
| O110 ↔ 1b | A6 (in part) ↔ the complement to 4b |
| O133 ↔ 2b | A7 (in part) ↔ the complement to 2b |
| O147 ↔ 4c | A8 (in part) ↔ the complement to 3b |
| O162 ↔ 3b | A9 (in part) ↔ the complement to 4c |

#### Sequences of Walker, Anchor, and Fuel Strands:

5'→3'

Walker-1: GCATCGTATGTAGCGCGTAGTGGTCGCACAATACACGGGTGTCAGTGTGTTGC

Walker-2: TACGTGATGACGTAAGTACTGATGTGGTAGGCTGCTGGCCGAGTTATGGTTGACCGC

Walker-3: GATCATGCAGTGGCTAGTCGTGGTATCGCTCGCGGCAAGTGCCAGTATAGCTG

Walker-4:

TGTGCGACCTGCTCTCGTGCTGATATGCCTTGATCGGACATCAGTACGTCATCACGTATTT  
TATCTGTTAGCA

Walker-5:

AGCGATACCTGATAATAGACTGTGAATAGTTGTACGGACTACGCGCTACATACGATGCTTT  
TGTGACGGCGTC

Walker-6:

CAGCCTACCTGGTGAGTAACGTCCATGTTCGATTACAGGACGACTAGCCACTGCATGATCTTT  
TGCGCCAATGGC

Walker-7:

TCAGCACGAGAGCACCGTACAACCTATTCACAGTCTATTATCACCTGAATCGACATGGACG  
TTACTCACCACCGATCAAGGCATATTTTGATAGGATCT

A-1: AGTAACCAAAGTACAGCACTGCGACGCCGTCACCAATAC

A-2: ACAGAGTCCGATGTGGATGTCATGCTAACAGATATCAGT

A-3: GATGTCGGTACGTGTAGCCACGGCCATTGGCGCTGCACG

A-4: CCATACAAGTATGTAGATCCTATCCATGAC

A-5: CATCGAGTGCATAGCGGTCGAGGACGCCGTCACGTAGTC

A-6: TGCCATGAAGTTGAAGATCCTATCGAACAT

A-7: GATGCGTAGACACGGTTAGCAGTGCTAACAGATACGGCA

A-8: TGATGCAAGTGTCGTTATGCGAGCCATTGGCGCTATACG

A-9: TGCCGACTCCAATGAGATCCTATCTGGACA

FA-1: GTATTGGTGACGGCGTCGCAGTGCTGTACTTTGGTTACT

FA-2: ACTGATATCTGTTAGCATGACATCCACATCGGACTCTGT

FA-3: CGTGCAGCGCCAATGGCCGTGGCTACACGTACCGACATC

FA-4: GTCATGGATAGGATCTACATACTTGTATGG

FA-5: GACTACGTGACGGCGTCCTCGACCGCTATGCACTCGATG

FA-6: ATGTTGATAGGATCTTCAACTTCATGGCA

FA-7: TGCCGTATCTGTTAGCACTGCTAACCGTGTCTACGCATC

FA-8: CGTATAGCGCCAATGGCTCGCATAACGACACTTGCATCA

FA-9: TGTCCAGATAGGATCTCATTGGAGTCGGCA

A-Biotin-Walker-7 is a special biotin modified strand that can anchor the walker to the streptavidin bead by binding with the foot on Walker-7. FA-Biotin-Walker-7 is A-Biotin-Walker-7's complementary strand.

A-Biotin-Walker-7: TT-Biotin-TT-Biotin-TTTTTTTTTTTAGATCCTATC

FA-Biotin-Walker-7: GATAGGATCTAAAAAAAAA

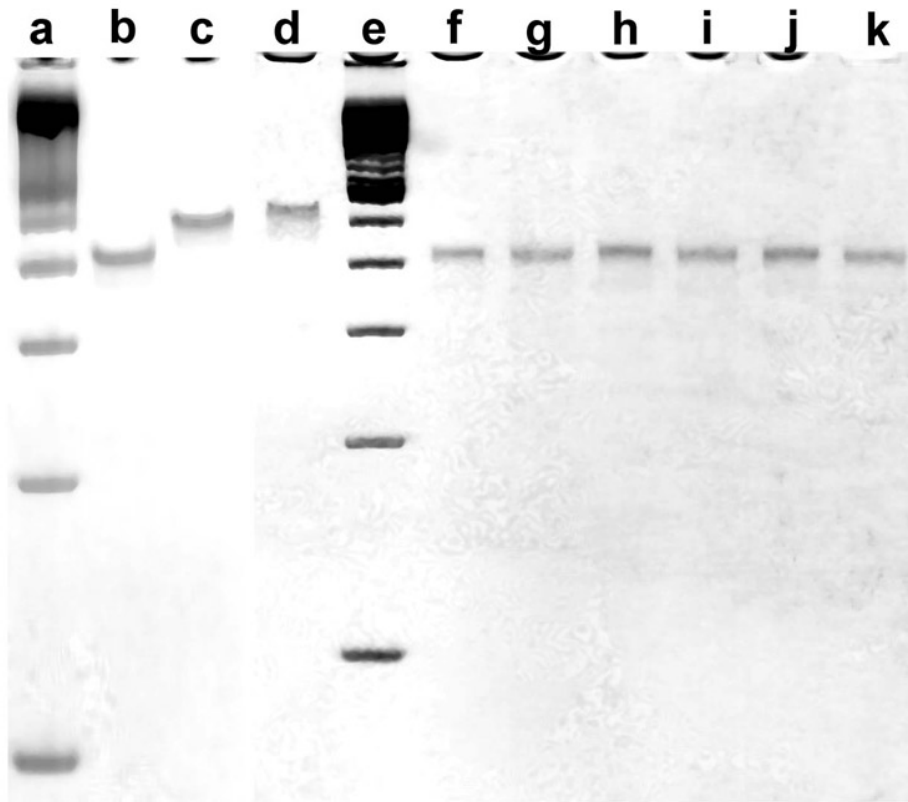

**Figure S6. Non-Denaturing Gels of Components of the System.**

The images are 5% non-denaturing gels run at 25 °C. Lane a contains a 100 nucleotide pair marker; lane b contains the walker without the foot and hand extensions; lane c contains the walker with the foot extensions, but without the hand extensions; lane d contains the walker with the foot and the hand extensions; lane e contains another 100 nucleotide pair marker; lanes f and g contain cassette 1 in the JX<sub>2</sub> and the PX states, respectively; lanes h and i contain cassette 2 in the JX<sub>2</sub> and the PX states, respectively; lanes j and k contain cassette 3 in the JX<sub>2</sub> and the PX states, respectively. For lanes b to d and f to k, 20  $\mu$ L of each molecule at a concentration of 50 nM were loaded into the well.



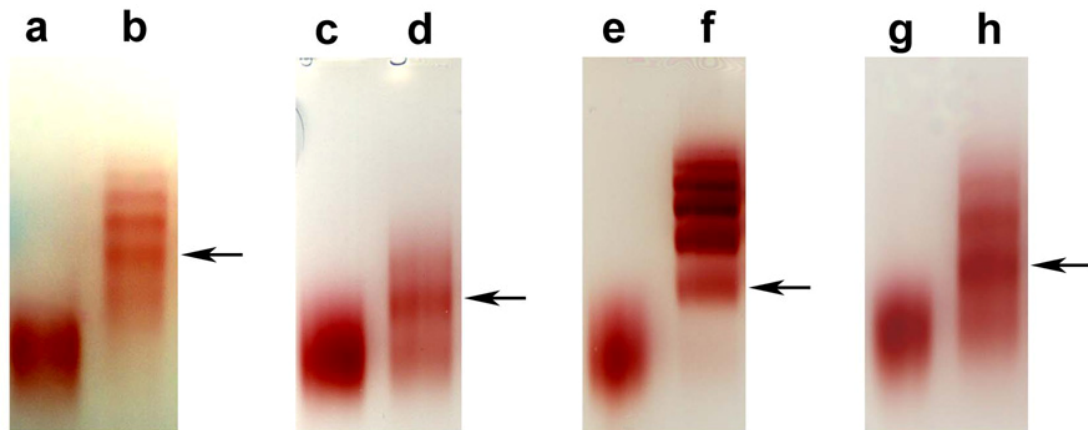

**Figure S7. 3% Agarose Gels showing the Au-DNA Conjugates.**

For each gel, the left lane contains Au nano-particles (AuNp) as a marker. The right lane contains the Au-DNA conjugates. From bottom to top, each band corresponds to particles bearing an increased number of DNA strands. The first conjugate was collected (arrow head) to form the cassettes. Lane a contains 5 nm AuNp; Lane b contains 5 nm AuNp and DNA duplex (arm of cassette 1) conjugates; Lane c contains 5 nm AuNp; Lane d contains 5 nm AuNp and the shorter DNA strand (arm of cassette 2) conjugates; Lane e contains 5 nm AuNp; Lane f contains 5 nm AuNp and the longer DNA strand (arm of cassette 2) conjugates; Lane g contains 10 nm AuNp; Lane h contains 10 nm AuNp and DNA duplex (arm of cassette 3) conjugates.

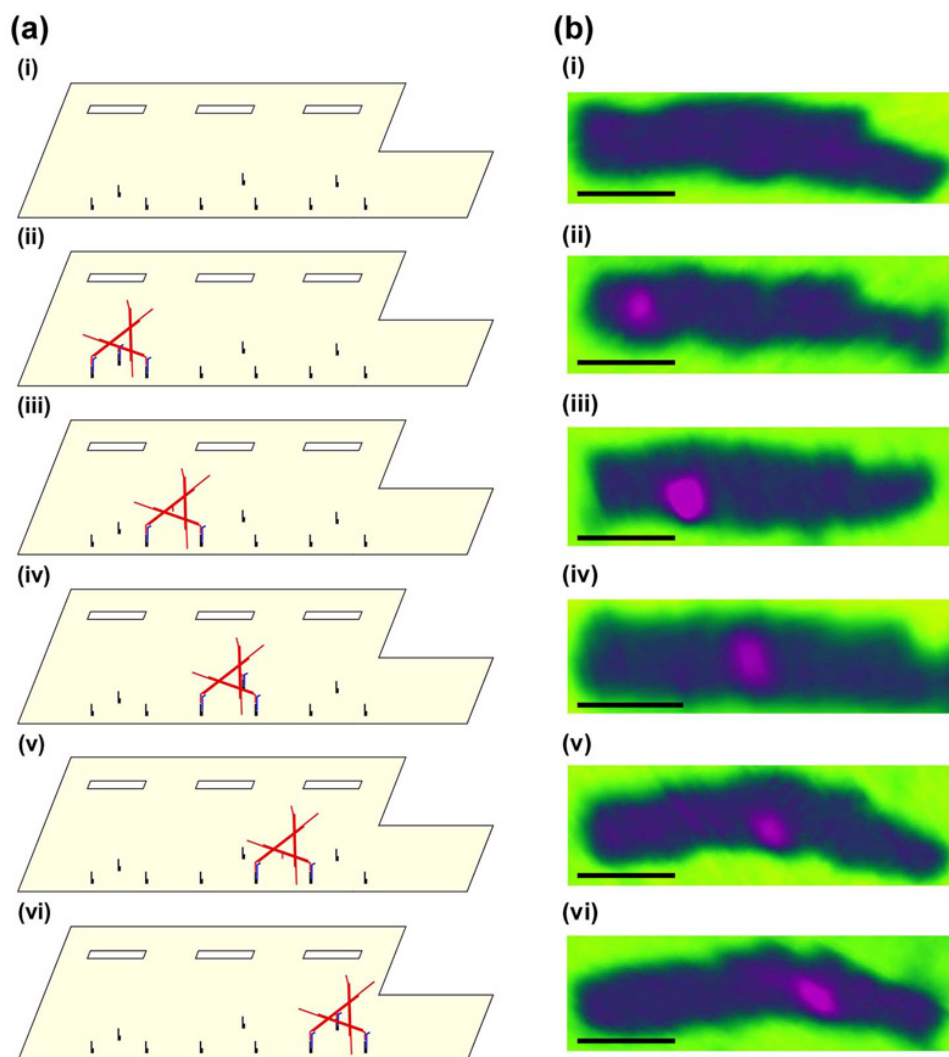

**Figure S8. Schematics (a) and Atomic Force Micrographs (b) of the Walking on the Origami.**

The origami with three slots is shown in light yellow in (a). Nine single strand extensions from the origami helper strands are shown as black stems. They are shown below the slots, and they act as stations for the walker. The walker is shown in red. AFM was performed in tapping mode in air in panel (b). Panel i of (a) illustrates the origami array containing slots for the cassettes, helper strand extensions for the walker and a notch to enable recognition of orientation; only the notch is visible in the AFM in (b), dehydration in air shrinks the origami, making the slots invisible. Panel (ii) of (a) illustrates the binding of the walker at the first transfer station shown below the left slot of the origami. The presence of the walker is evident in the AFM image in (b). Panels (iii) show the first step walking forward along the origami in the schematic (a) and in the AFM image (b). Panels (iv) illustrate the second step walking forward (a), bringing the walker to the second transfer station shown below the middle slot of the origami, which is evident in the AFM image (b). Panels (v) show the third step walking forward, both schematically (a) and in the AFM image (b). Panels (vi) illustrate the fourth step walking forward, positioning the walker at the third transfer station, shown below the right slot of the origami (a); it is visible in the AFM image (b). All scale bars are 50 nm.

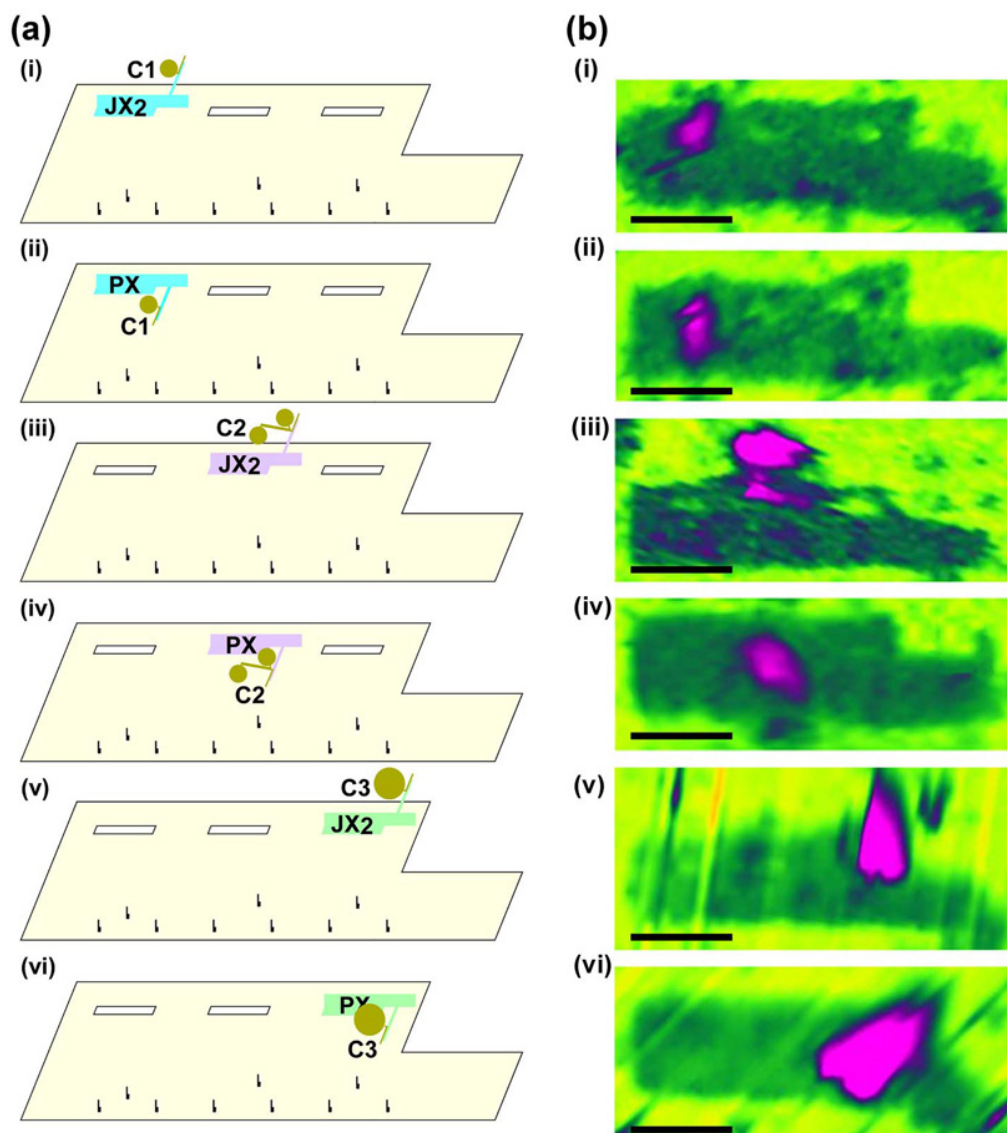

**Figure S9. Schematics (a) and Atomic Force Micrographs (b) of the  $JX_2$  to PX Switching for Each Cassette.**

AFM was done in tapping mode in buffer. Panel (i) of (a) shows cassette 1 with cargo-1 (5 nm Au) in the  $JX_2$  state was placed into the left slot; it is visible in the AFM (b). Panel (ii) of (a) illustrates the state of cassette 1 dynamically switching from  $JX_2$  to PX, bringing the 5 nm Au toward the walker pathway, which is shown clearly in the AFM (b). Panels (iii) to (iv) of (a) schematically show the result of insertion into the middle slot, cassette 2 with cargo-2 (double 5 nm Au) switching from the  $JX_2$  state to the PX state; the AFM image (b) clearly shows the change of Au position. Panels (v) to (vi) of (a) illustrate insertion into the right slot, cassette 3 with cargo-3 (10 nm Au) programmed from  $JX_2$  to PX state in the schematics; the reprogramming switched Au from up to down, which is evident in the AFM images (b).

**Figure S10. Additional Zoomed TEM Images of the Walker with Cargo-1 and Cargo-3 for Statistical Analysis.**

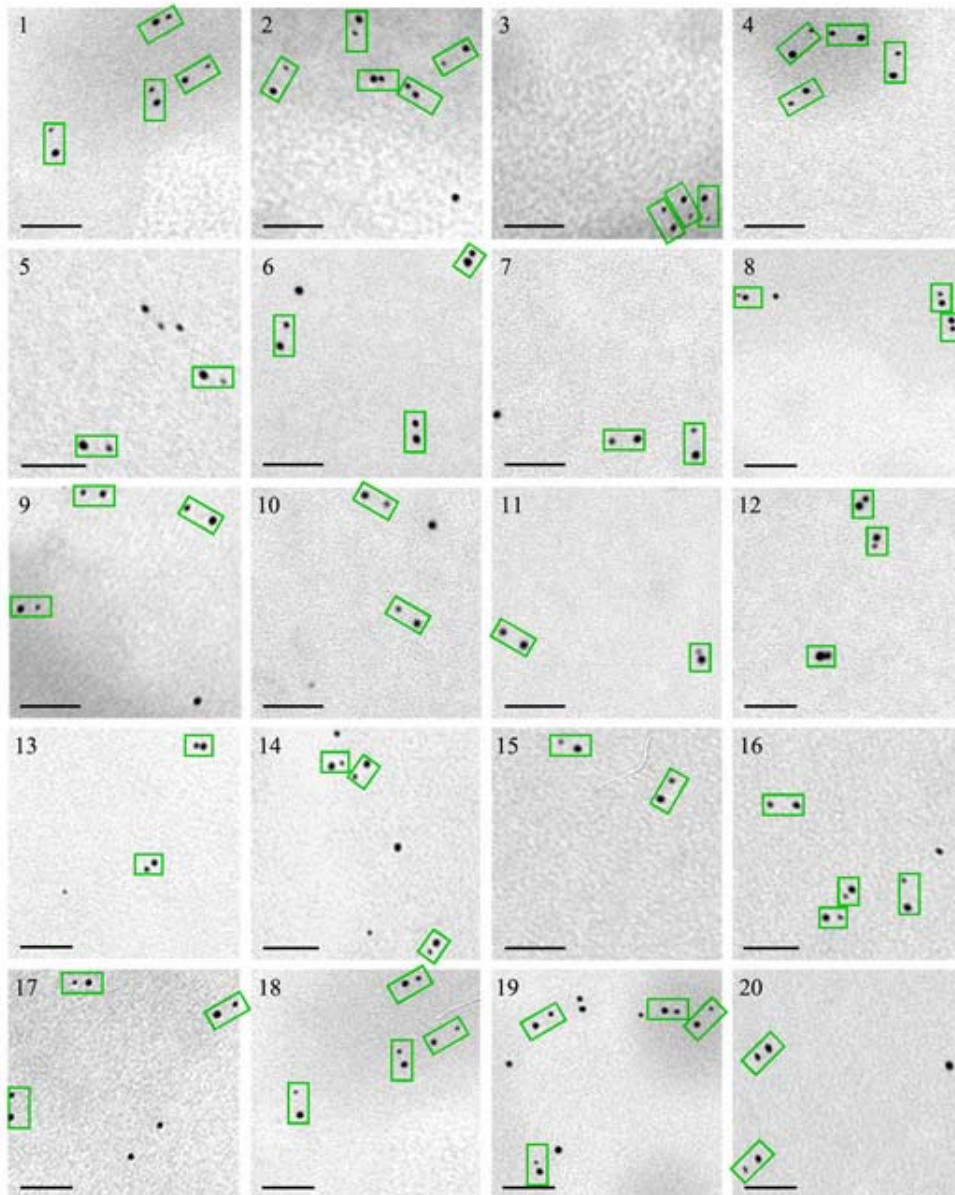



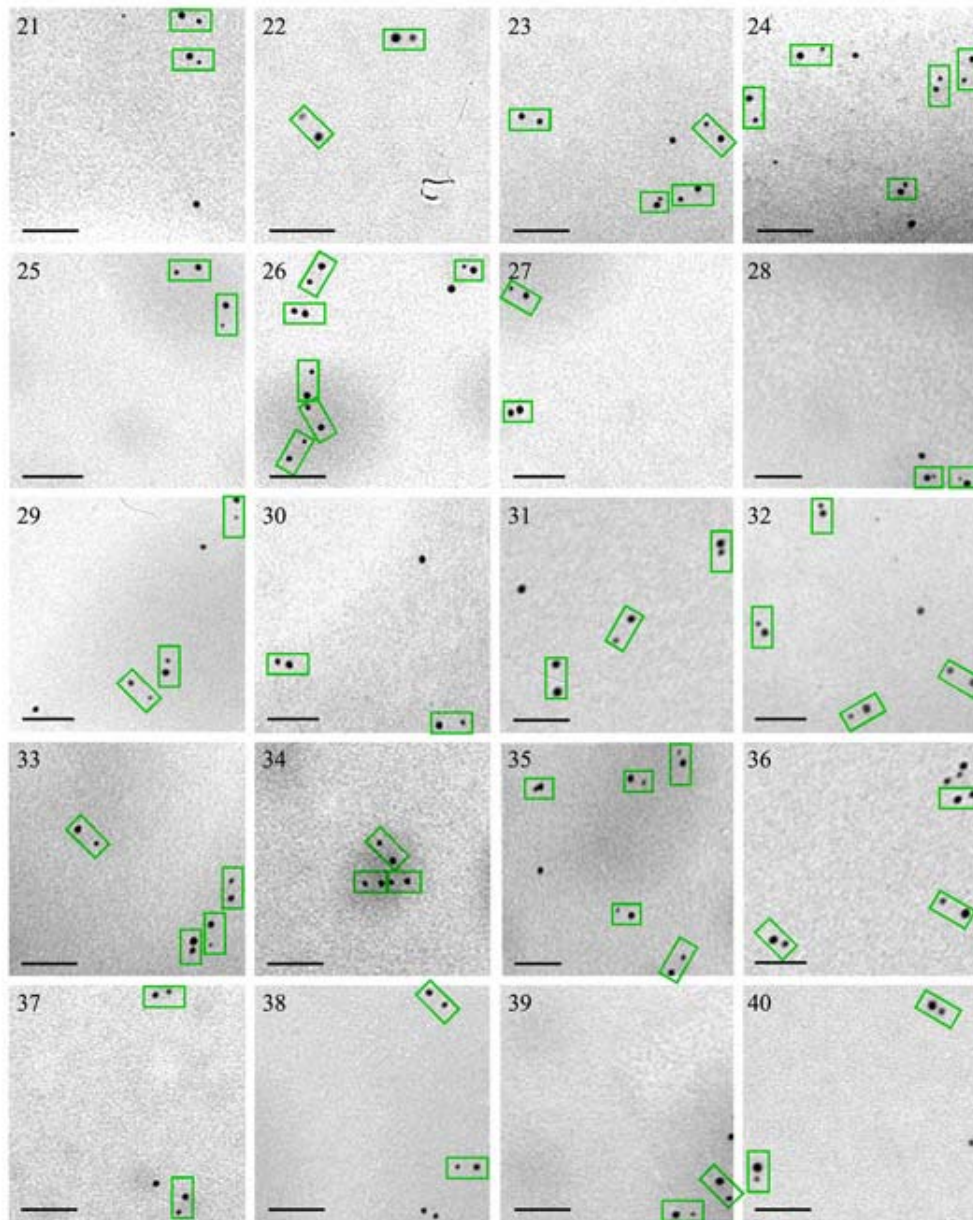

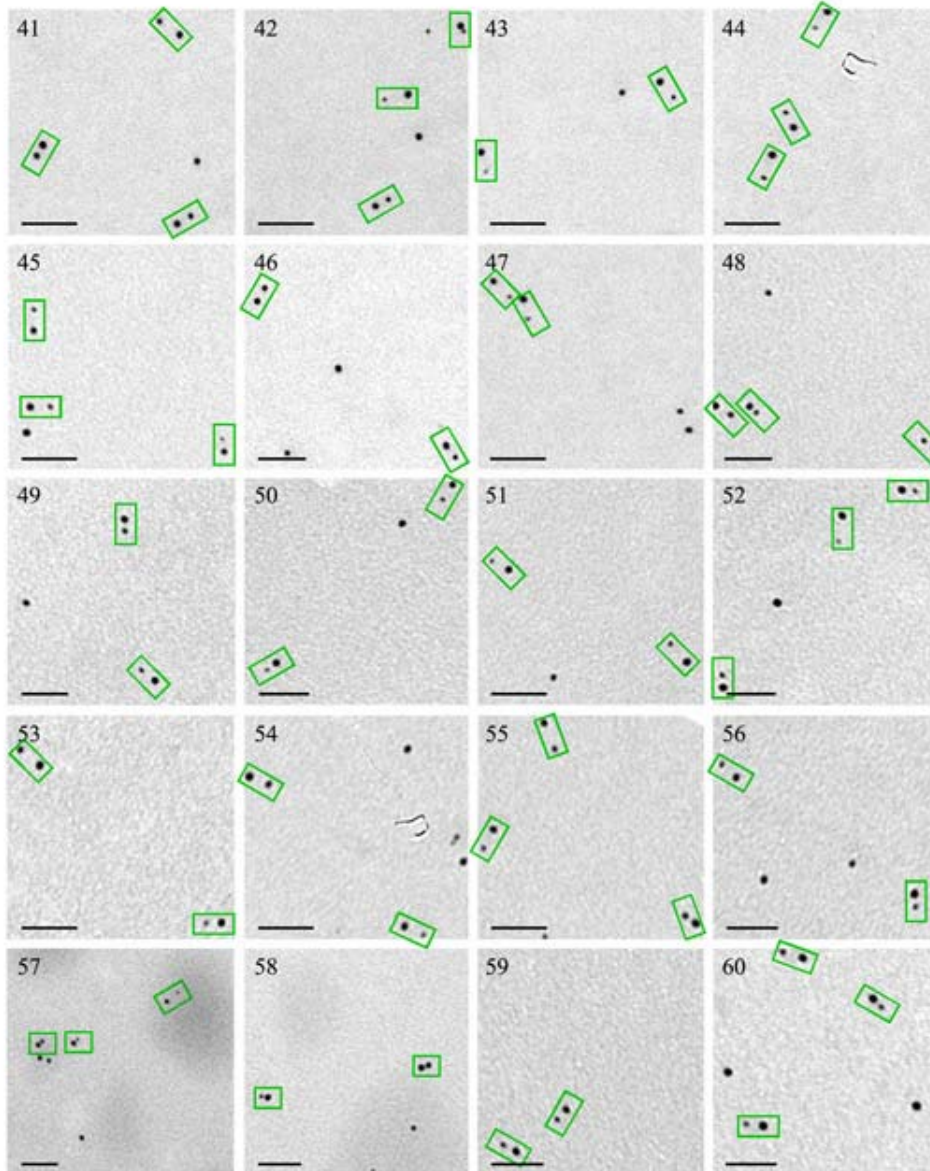

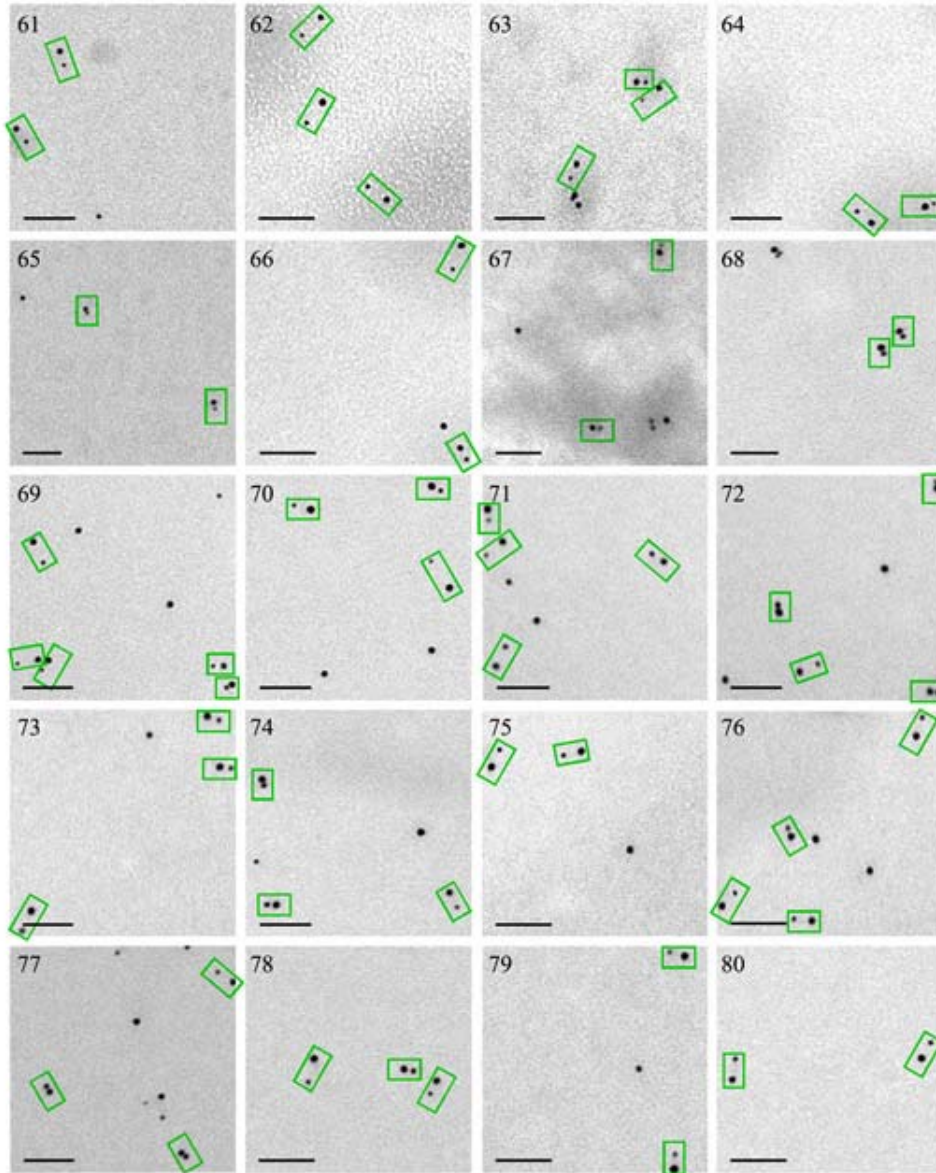



**Figure S11. Additional Zoomed TEM Images of the Walker with Cargo-1, Cargo-2, and Cargo-3 for Statistical Analysis.**

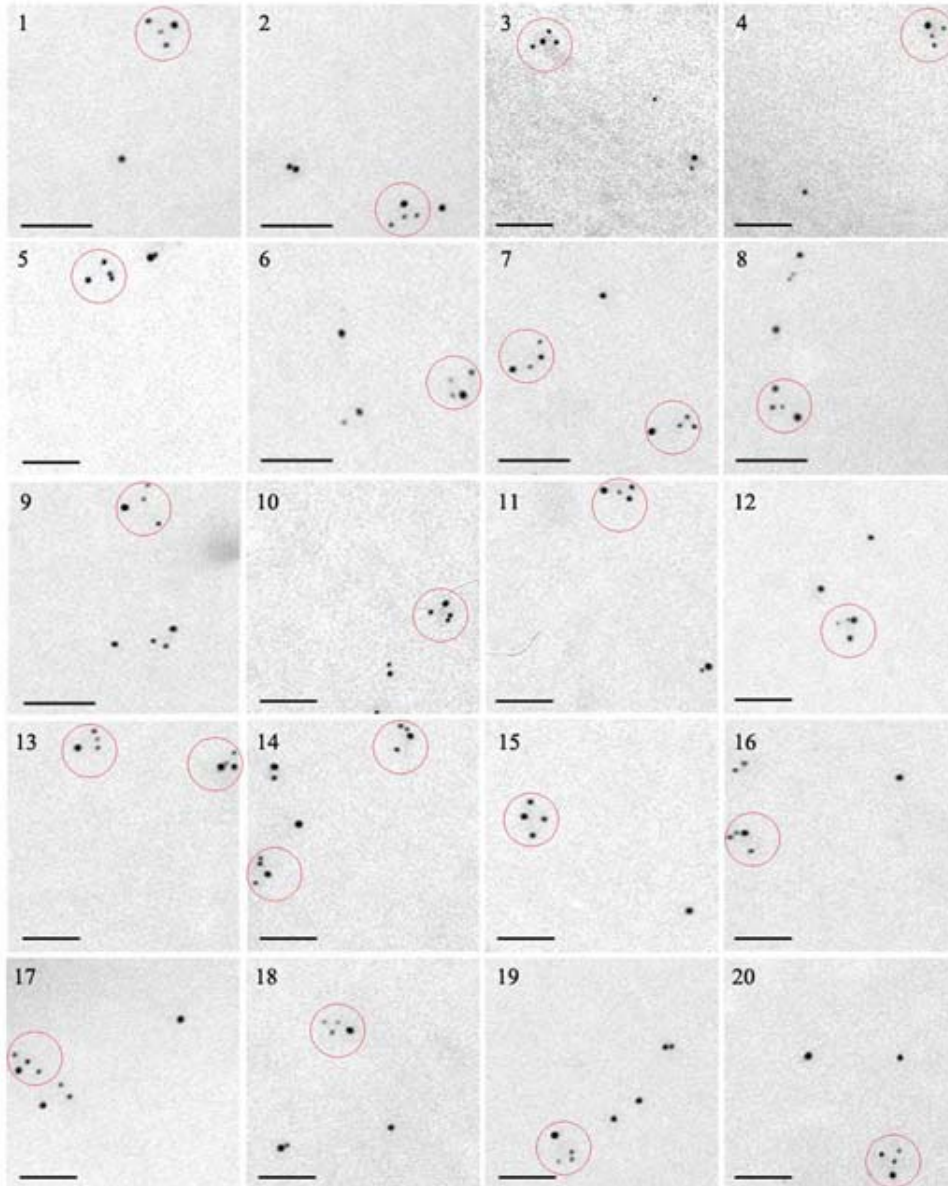



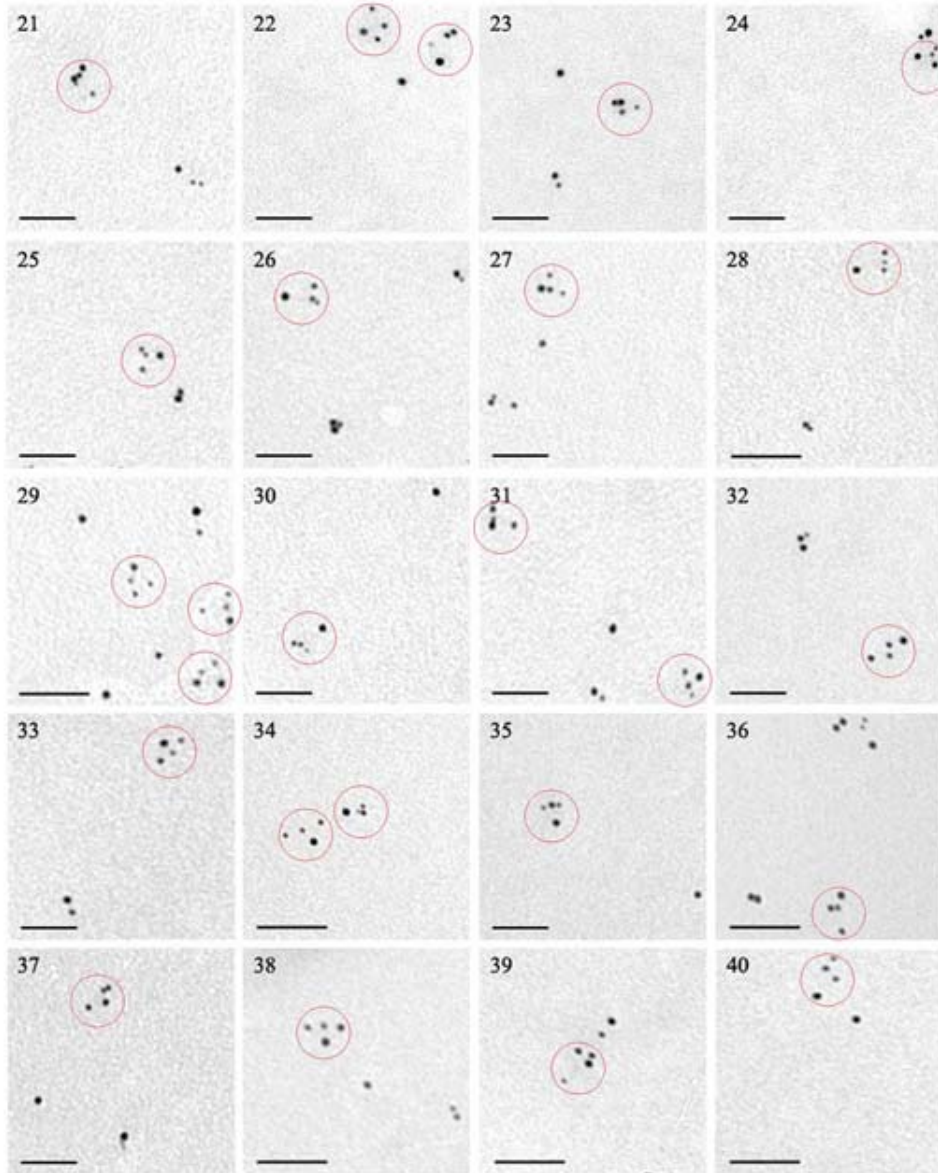

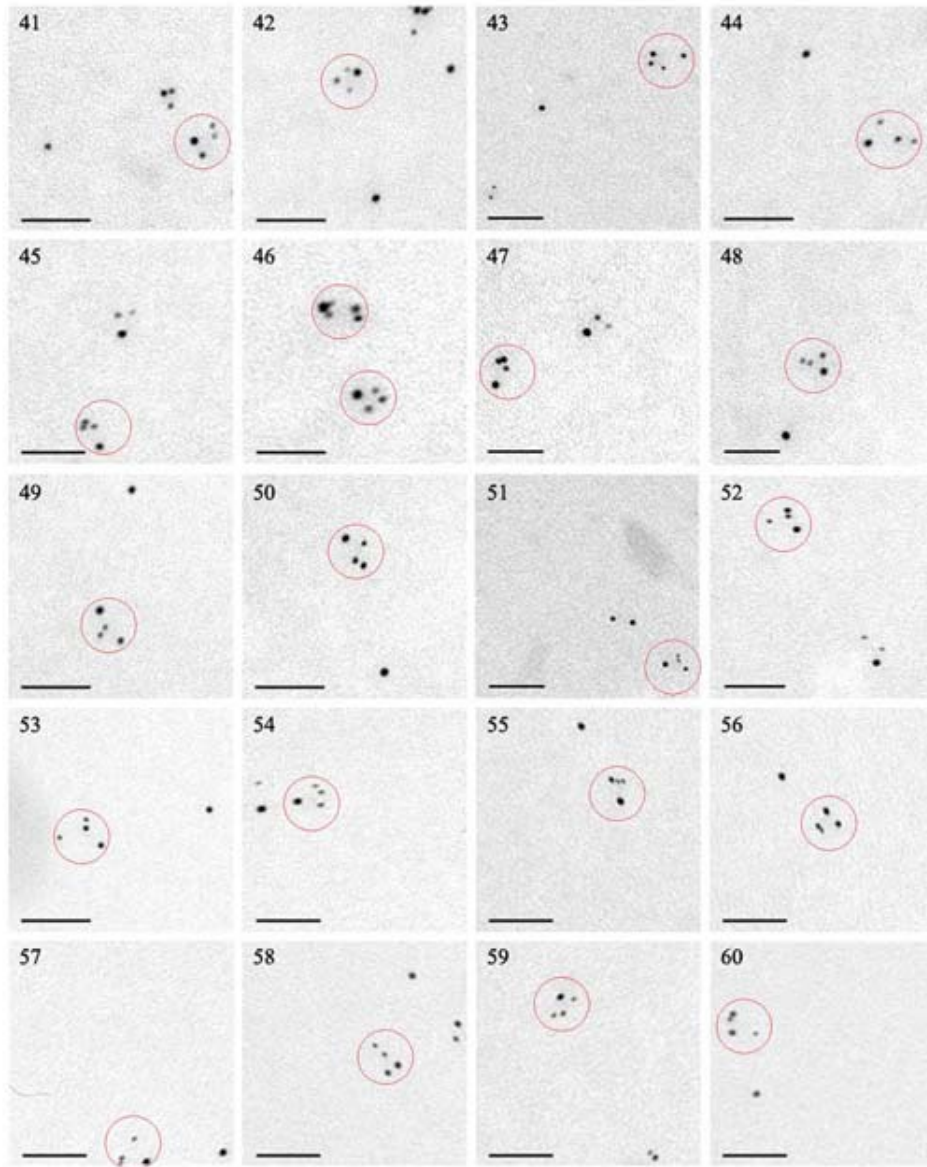

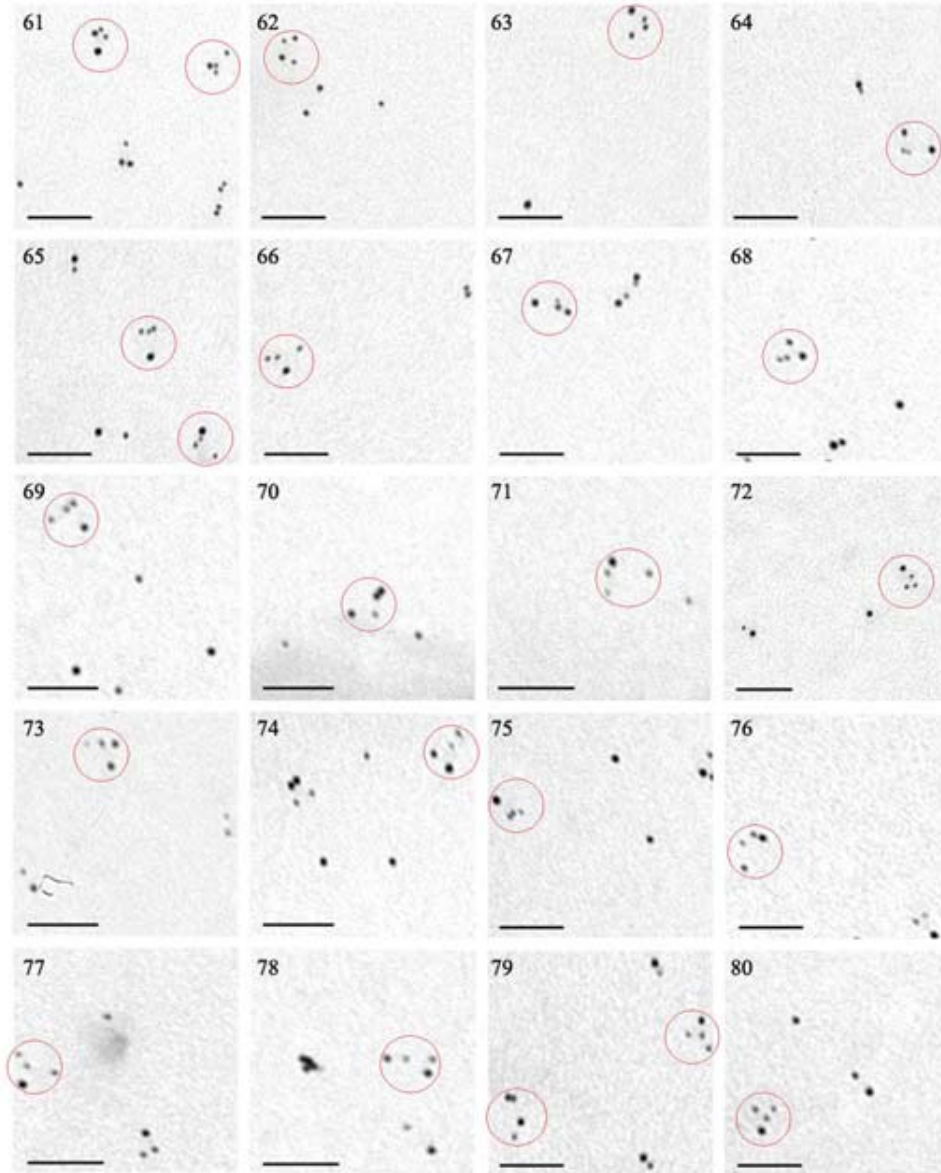

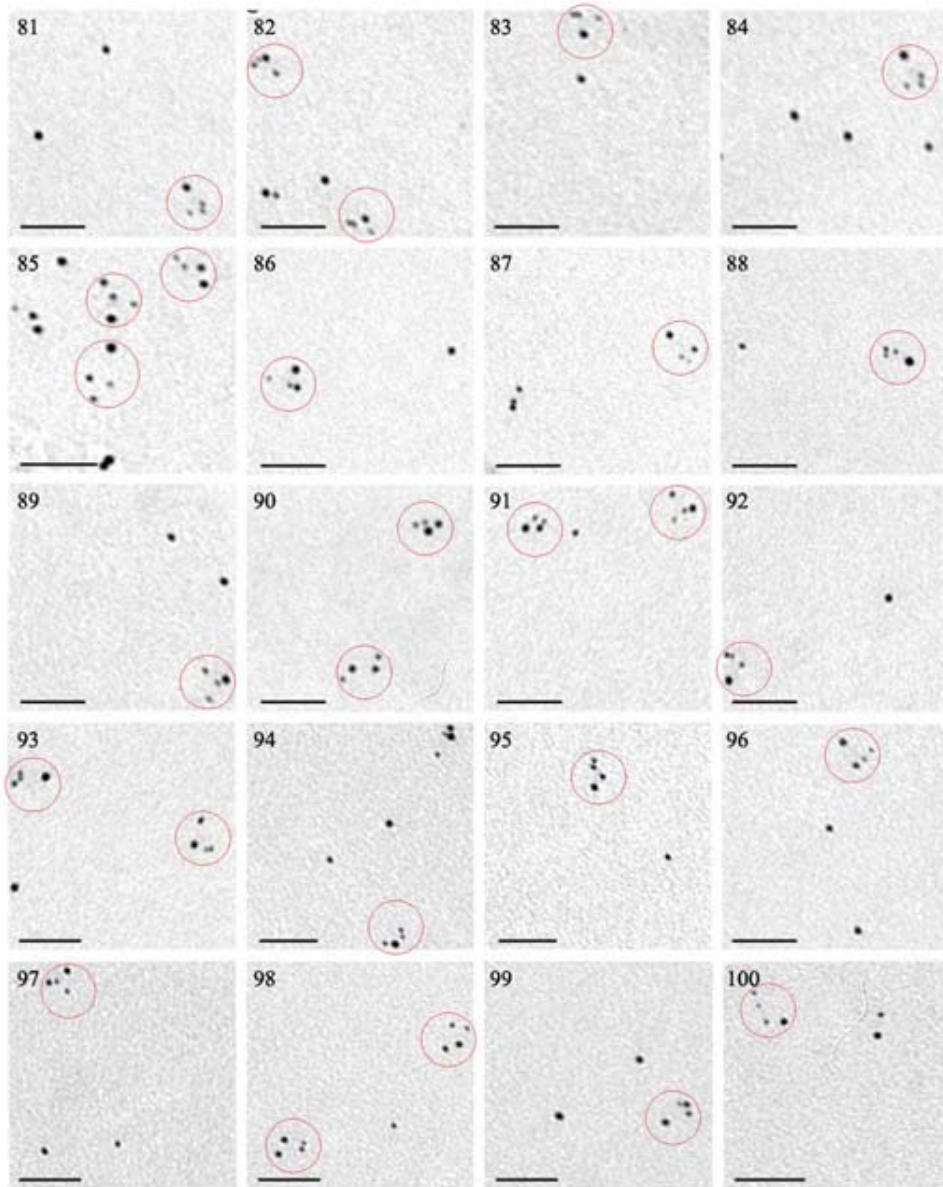

**Figure S12. Distance Distribution between the 5 nm Au nanoparticle and the 10 nm Au nanoparticle on the Walker.**

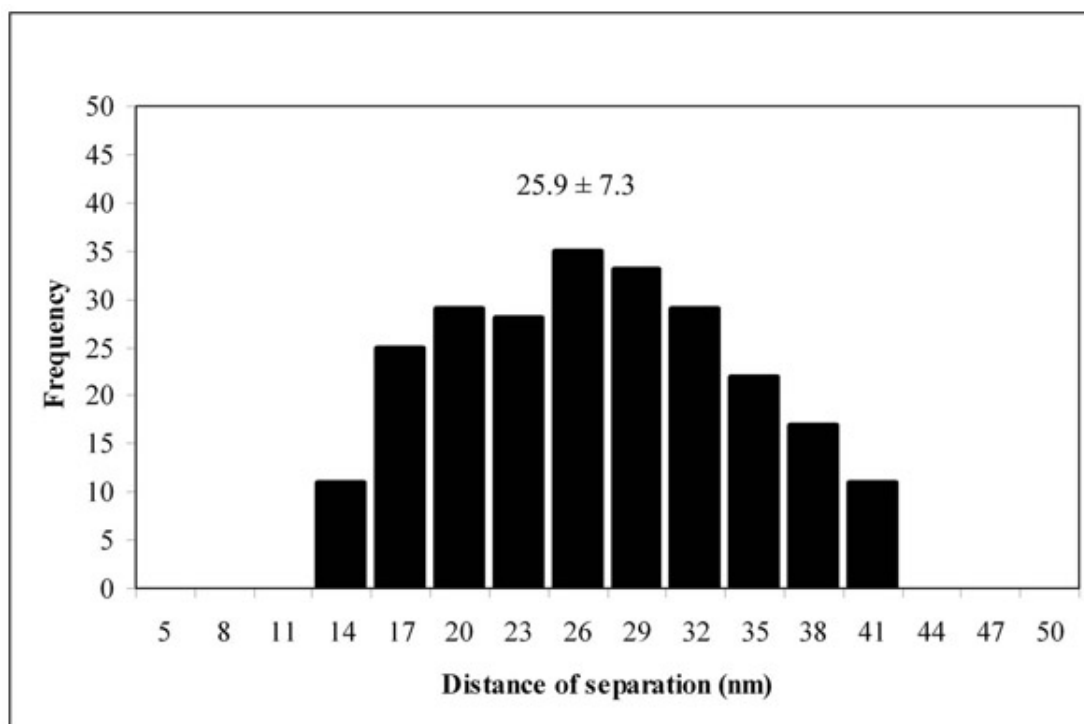

**Table S1. Statistical Analysis for Different Additions.**

|                                                                                                                        |           |       |                        |
|------------------------------------------------------------------------------------------------------------------------|-----------|-------|------------------------|
| When the 3 kinds of gold are all set to be transferred to and carried by the walker, the yield is around 43%.          |           |       |                        |
|                                                                                                                        | Frequency | Yield |                        |
| (5)/(5-5)/(10)                                                                                                         | 119       | 43%   | Target products        |
| (5)/(5-5) or (5)/(10) or (5-5)/(10)                                                                                    | 54        | 20%   | Partly formed products |
| (5) or (5-5) or (10)                                                                                                   | 102       | 37%   | Partly formed products |
| The numbers are counted from 100 zoom-in TEM pictures.                                                                 |           |       |                        |
|                                                                                                                        |           |       |                        |
| When any 2 out of the 3 kinds of gold are set to be transferred to and carried by the walker, the yield is around 70%. |           |       |                        |
| Take (5)/(10) as an example:                                                                                           |           |       |                        |
|                                                                                                                        | Frequency | Yield |                        |
| (5)/(10)                                                                                                               | 225       | 72%   | Target products        |
| (5)/(5-5) or (5-5)/(10) or (5-5) or (5)/(5-5)/(10)                                                                     | 7         | 2%    | Mistaken products      |
| (5) or (10)                                                                                                            | 82        | 26%   | Partly formed products |
| The numbers are counted from 80 zoom-in TEM pictures.                                                                  |           |       |                        |
|                                                                                                                        |           |       |                        |
| When any 1 out of the 3 kinds of gold are set to be transferred to and carried by the walker, the yield is above 90%.  |           |       |                        |
